# Supplementary material
Source: HighWire-hosted journal article supplement (https://www.jrheum.org/highwire/filestream/33819/field_highwire_adjunct_files/0/171385DataSuppl.pdf)

ONLINE SUPPLEMENTARY DATA

**Supplementary Table 1.** Model specifications for the construction of inverse probability weights at the index visit.

| Specification | Description <sup>a</sup>                                                                                                                                                                                                                                                          | Estimated weights |      |        |      |         |         |
|---------------|-----------------------------------------------------------------------------------------------------------------------------------------------------------------------------------------------------------------------------------------------------------------------------------|-------------------|------|--------|------|---------|---------|
|               |                                                                                                                                                                                                                                                                                   | Mean              | SD   | Median | IQR  | Minimum | Maximum |
| 1             | Numerator include linear terms for baseline WOMAC subscales, SF12 PCS &MCS, and KOOS QoL in addition to baseline categorical variables such as KL grade, injury & surgery Hx, and BMI<br><br>Denominator also includes WOMAC subscales, KL grade, and KOOS QoL at the index visit | 1.02              | 0.64 | 0.89   | 0.53 | 0.15    | 6.69    |
| 2             | Numerator and denominator are as in specification 1, but without KL grade and KOOS QoL at the index visit in denominator                                                                                                                                                          | 1.03              | 0.52 | 0.93   | 0.48 | 0.10    | 4.02    |
| 3             | Numerator and denominator are as in specification 2, plus adding WOMAC subscale*WOMAC                                                                                                                                                                                             | 1.00              | 0.54 | 0.88   | 0.46 | 0.18    | 3.96    |

|   |                                                                                                                                |      |      |      |      |      |      |
|---|--------------------------------------------------------------------------------------------------------------------------------|------|------|------|------|------|------|
|   | subscale at the index visit in denominator                                                                                     |      |      |      |      |      |      |
| 4 | Numerator and denominator are as in specification 3, but replace linear terms for time-varying WOMAC subscales with categories | 0.96 | 0.24 | 0.93 | 0.19 | 0.50 | 2.37 |

Abbreviations: SD, standard deviation; IQR, interquartile range

<sup>a</sup> All models include age, sex, race/ethnicity, education, and household income at enrollment

**Supplementary Table 2.** Sociodemographic and clinical factors among people with radiographically confirmed knee OA by censoring mechanisms.

| Characteristics                      | Death<br>(n=3)    | Total knee<br>replacement<br>(n=52) | Switching<br>(n=34) | Non-<br>censored<br>(n=323) |
|--------------------------------------|-------------------|-------------------------------------|---------------------|-----------------------------|
|                                      | <i>Percentage</i> |                                     |                     |                             |
| HA initiator                         | 33.3              | 32.7                                | 29.4                | 20.4                        |
| Mean age (years, (SD))               | 65.7 (6.7)        | 68.8 (8.9)                          | 65.4 (9.9)          | 66.2 (9.0)                  |
| Women                                | 33.3              | 48.1                                | 67.7                | 61.0                        |
| Ethnicity/Race                       |                   |                                     |                     |                             |
| Non-Hispanic White                   | 100.0             | 90.4                                | 79.4                | 78.0                        |
| Non-Hispanic Black                   | 0                 | 3.9                                 | 5.9                 | 18.3                        |
| Other                                | 0                 | 5.8                                 | 14.7                | 3.7                         |
| Education                            |                   |                                     |                     |                             |
| High school or less                  | 0                 | 17.6                                | 8.8                 | 18.3                        |
| Some college                         | 0                 | 19.6                                | 23.5                | 28.0                        |
| College graduate                     | 0                 | 31.4                                | 32.4                | 19.3                        |
| Graduate school                      | 100.0             | 31.4                                | 35.3                | 34.5                        |
| Income (\$)                          |                   |                                     |                     |                             |
| <25,000                              | 0                 | 7.8                                 | 5.9                 | 14.6                        |
| 25,000 - 50,000                      | 0                 | 27.5                                | 29.4                | 29.8                        |
| >50,000                              | 100.0             | 64.7                                | 64.7                | 55.6                        |
| KL grade                             |                   |                                     |                     |                             |
| 2                                    | 0                 | 4.1                                 | 41.9                | 41.1                        |
| 3                                    | 33.3              | 42.9                                | 25.8                | 41.4                        |
| 4                                    | 66.7              | 53.1                                | 32.3                | 17.5                        |
| Symptom-related multi-<br>joint OA   | 33.3              | 59.6                                | 50.0                | 56.0                        |
| History of knee injury               | 33.3              | 57.7                                | 44.1                | 42.4                        |
| History of knee surgery              | 33.3              | 38.5                                | 32.4                | 32.5                        |
| Body Mass Index (kg/m <sup>2</sup> ) |                   |                                     |                     |                             |
| <25                                  | 0                 | 17.3                                | 17.7                | 12.4                        |
| 25 - <30                             | 33.3              | 42.3                                | 44.1                | 37.5                        |
| ≥30                                  | 66.7              | 40.4                                | 38.2                | 50.2                        |
| Knee alignment                       |                   |                                     |                     |                             |
| Normal                               | 0                 | 17.7                                | 28.1                | 19.9                        |
| Varus                                | 66.7              | 54.9                                | 34.4                | 37.0                        |
| Valgus                               | 33.3              | 27.5                                | 37.5                | 43.1                        |
| CESD (>16)                           | 100.0             | 6.1                                 | 6.5                 | 11.7                        |

|                                |                                  |             |             |             |
|--------------------------------|----------------------------------|-------------|-------------|-------------|
| Charlson Comorbidity Index     |                                  |             |             |             |
| 0                              | 33.3                             | 63.5        | 70.6        | 66.9        |
| 1                              | 33.3                             | 19.2        | 17.7        | 19.2        |
| ≥2                             | 33.3                             | 17.3        | 11.8        | 13.9        |
|                                | <i>Mean (standard deviation)</i> |             |             |             |
| WOMAC Pain                     | 2.0 (3.5)                        | 5.5 (3.1)   | 5.2 (3.5)   | 5.0 (4.0)   |
| WOMAC Stiffness                | 1.0 (1.7)                        | 2.7 (1.7)   | 2.8 (1.5)   | 2.6 (1.7)   |
| WOMAC Physical Function        | 7.8(12.6)                        | 19.4 (11.2) | 17.4 (11.4) | 16.4 (13.0) |
| KOOS-QoL                       | 66.7 (20.1)                      | 48.7 (18.5) | 52.7 (14.4) | 54.9 (20.2) |
| SF-12 Physical Component Score | 30.6 (12.1)                      | 41.6 (9.0)  | 40.6 (7.8)  | 43.3 (9.6)  |
| SF-12 Mental Component Score   | 59.9 (4.8)                       | 56.6 (7.0)  | 56.5 (6.8)  | 53.8 (8.4)  |
| Joint space width (mm)         | 4.5 (2.1)                        | 2.7 (1.9)   | 4.1 (1.8)   | 4.8 (1.9)   |

**Supplementary Figure 1.** Graphical representation of evaluation the experimental treatment assumption.

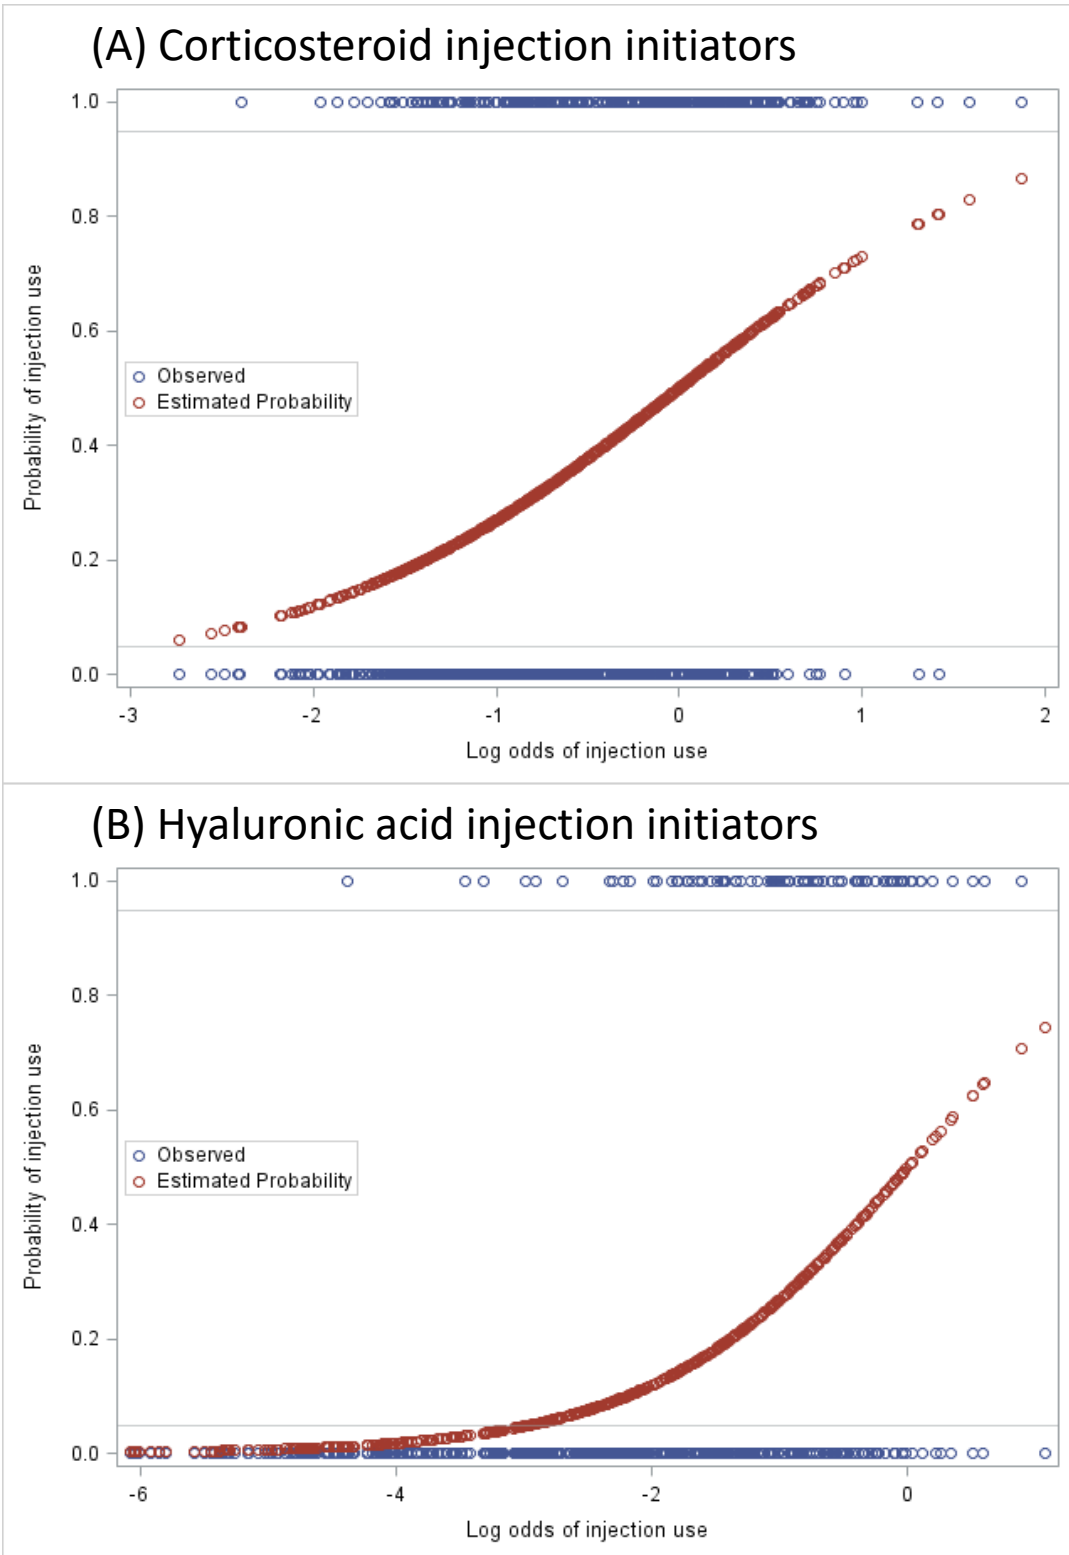

Supplement: 171385DataSuppl.pdf [file 171385DataSuppl.pdf]
